# Supplementary material for: Prevalence of human papillomavirus (HPV) in Brazil: A systematic review and meta-analysis
Source: PubMed Central journal article supplement (PMC7034815; doi:10.1371/journal.pone.0229154), 2020-02-21
Supplement: pone.0229154.s002.pdf [file pone.0229154.s002.pdf]

## Additional File 1. Details of electronic bibliographic database search strategies

### **Medline (via Pubmed)**

(((((Brasil\* OR Brazil\*)) OR Brazil[mesh]

AND

((("human papillomavirus") OR ("Human papillomavirus 31"[Mesh] OR "Human papillomavirus 6"[Mesh] OR "Human papillomavirus 16"[Mesh] OR "Human papillomavirus 18"[Mesh] OR "Human papillomavirus 11"[Mesh])) OR HPV)))

AND

((human) NOT animal)

### **Embase**

'human papillomavirus type 11'/exp OR 'human papillomavirus type 16'/exp OR  
'human papillomavirus type 18'/exp OR 'human papillomavirus type 31'/exp OR  
'human papillomavirus type 33'/exp OR 'human papillomavirus type 35'/exp OR  
'human papillomavirus type 45'/exp OR 'human papillomavirus type 52'/exp OR  
'human papillomavirus type 58'/exp OR 'human papillomavirus type 59'/exp OR  
'human papillomavirus type 6'/exp OR 'human papillomavirus type 73'/exp OR  
'Wart virus'/exp OR 'human papillomavirus':ab,ti OR 'hpv':ab,ti

AND

('brazil'/exp OR brazil\*:ab,ti OR brasil\*:ab,ti)

NOT

[animals]/lim

### **Lilacs**

(HPV OR Human papillomavirus OR Papillomavirus humano)

AND

(Brasil\$ OR Brazil\$)

### **Scielo**

("human papillomavirus" OR "papillomavirus humano" OR "human papilloma virus" OR HPV)

AND

(Brasil\* OR Brazil\*)

**ISI - Web of Knowledge**

TS= ("human papillomavirus" OR HPV)

AND

TS=(Brazil\* OR Brasil\*)
