# Supplementary material for: Prevalence of human papillomavirus (HPV) in Brazil: A systematic review and meta-analysis
Source: PubMed Central journal article supplement (PMC7034815; doi:10.1371/journal.pone.0229154), 2020-02-21
Supplement: pone.0229154.s003.pdf [file pone.0229154.s003.pdf]

| Author, year             | Region, State | Study design                   | Population                                                                                                                                                                                                                                                                                                                                                                      | Proportion of Women (%) | N    | Age (mean)                                                                                                   | Age (range) |
|--------------------------|---------------|--------------------------------|---------------------------------------------------------------------------------------------------------------------------------------------------------------------------------------------------------------------------------------------------------------------------------------------------------------------------------------------------------------------------------|-------------------------|------|--------------------------------------------------------------------------------------------------------------|-------------|
| <b>Cervical region</b>   |               |                                |                                                                                                                                                                                                                                                                                                                                                                                 |                         |      |                                                                                                              |             |
| Alvarez-Arguelles, 2009  | Undefined     | Abstract Meeting               | Women attending Sexual infection disease control program                                                                                                                                                                                                                                                                                                                        | 100                     | 472  | 28.9                                                                                                         | 18-75       |
| Amaro Filho, 2014        | Southeast, RJ | Cross-sectional                | Women selected from the archives                                                                                                                                                                                                                                                                                                                                                | 100                     | 87   | 51.1                                                                                                         | 24-88       |
| Amorim, 2017             | Northeast     | Cross-sectional (case-control) | Women seeking medical consultations, with a positive diagnosis for cervical lesions (Cervical Intraepithelial Neoplasia (CIN) 1, 2 and 3 or in situ carcinoma) were selected as the case group. The controls (women without cervical lesion) were from the Primary Care Units of Public Health Clinics (SUS – Brazil) also located in Vitória da Conquista city, Bahia, Brazil. | 100                     | 132  | Control: 37.6 / Case: 38.7                                                                                   | 14-78       |
| Araujo, 2014b            | Southeast, SP | Cross-sectional                | Athletes                                                                                                                                                                                                                                                                                                                                                                        | 100                     | 50   | 20                                                                                                           | -           |
| Augusto, 2014            | Southeast, RJ | Cross-sectional                | Women referred to the Family Health Program                                                                                                                                                                                                                                                                                                                                     | 100                     | 351  | 38.4                                                                                                         | 14-79       |
| Ayres, 2017              | Southeast, MG | Cross-sectional                | Women living in the public health care coverage area between 20 and 59 years of age, asymptomatic                                                                                                                                                                                                                                                                               | 100                     | 2076 | 20–24: 258<br>25–29: 279<br>30–34: 303<br>35–39: 280<br>40–44: 274<br>45–49: 246<br>50–54: 222<br>55–59: 200 | 20-59       |
| Balbi, 2015              | North, PA     | Thesis                         | Women attended at gynecology ambulatory                                                                                                                                                                                                                                                                                                                                         | 100                     | 213  | 50.7                                                                                                         | 35-60       |
| Baldin-Dal Pogetto, 2011 | Southeast, SP | Cross-sectional                | Female sex workers                                                                                                                                                                                                                                                                                                                                                              | 100                     | 102  | 26.1                                                                                                         | -           |
| Batista, 2017            | Northeast, MA | Cross-sectional                | Women 15 to 75 years of age from the municipalities of the east coast of Maranhão in the mentioned communities and living and registered in the areas covered by family health teams.                                                                                                                                                                                           | 100                     | 353  | <30: 99<br>31-40: 88<br>41-50: 72<br>51-60: 59<br>>60: 35                                                    | -           |
| Becker, 2001             | South, RS     | Cross-sectional                | Women from Women`s Anti-Cancer Program                                                                                                                                                                                                                                                                                                                                          | 100                     | 977  | 39.1                                                                                                         | 16-70       |

|                      |                  |                 |                                                                                                                                                                                                   |     |     |                                                                                                   |       |
|----------------------|------------------|-----------------|---------------------------------------------------------------------------------------------------------------------------------------------------------------------------------------------------|-----|-----|---------------------------------------------------------------------------------------------------|-------|
| Boon, 2001           | South, RS        | Case-control    | Female partners of HIV (+) infected men                                                                                                                                                           | 100 | 44  | 28.5                                                                                              | -     |
| Brito, 2002          | North, AM        | Cross-sectional | Indigenous women                                                                                                                                                                                  | 100 | 49  | 25                                                                                                | 10-73 |
| Caixeta, 2015        | Central-West, GO | Cross-sectional | Users of public health system                                                                                                                                                                     | 100 | 251 | 19.4                                                                                              | 15-25 |
| Campos, 2012         | Central-West, GO | Case-control    | Anticancer Association and Basic Health Units                                                                                                                                                     | 100 | 173 | -                                                                                                 | 16-48 |
| Campos, 2014         | Central-West, MS | Cross-sectional | Patients from Municipal Laboratory                                                                                                                                                                | 100 | 170 | NI                                                                                                | 18-65 |
| Cassel, 2014         | South, RS        | Cross-sectional | Normal cervical smears from healthcare medical center                                                                                                                                             | 100 | 158 | 42.7                                                                                              | -     |
| Ceccato Junior, 2015 | Southeast, MG    | Cross-sectional | HIV (-)                                                                                                                                                                                           | 100 | 160 | 35.3                                                                                              | -     |
| Chagas, 2015         | Northeast, PE    | Cross-sectional | Women who volunteered for cervical cancer screening                                                                                                                                               | 100 | 594 | -                                                                                                 | -     |
| Coser, 2013          | South, RS        | Cross-sectional | Women undergoing routine pap smear testing, public center                                                                                                                                         | 100 | 337 | -                                                                                                 | -     |
| Coser, 2016          | South, RS        | Cross-sectional | Women who accepted to participate in the study while attending for cervical cancer screening in a primary public health care clinic                                                               | 100 | 300 | ≤19: 28(9.3)<br>20-29: 56(18.7)<br>30-39: 59(19.7) 40-49: 60(20)<br>50-59: 59(19.7) ≥60: 38(12.7) | -     |
| Costa-Lira, 2017     | North, AM        | Cross-sectional | women who used public health services                                                                                                                                                             | 100 | 180 | 16-20: 23<br>21-30: 53<br>31-40: 71<br>41-50: 32                                                  | -     |
| da Silva, 2012       | South, PR        | Cross-sectional | Women from cervical screening campaign                                                                                                                                                            | 100 | 418 | 42.8                                                                                              | -     |
| de Abreu, 2016       | South, PR        | Cross-sectional | Women attending basic health units of the Public Health System for cervical cancer screening consultations and reference services for colposcopy (Zona Sul Clinic) from August 2012 to March 2013 | 100 | 838 | 40.03                                                                                             | 18-68 |

|                        |                  |                 |                                                                                                                                                                                                                                                                 |     |                                |                                   |       |
|------------------------|------------------|-----------------|-----------------------------------------------------------------------------------------------------------------------------------------------------------------------------------------------------------------------------------------------------------------|-----|--------------------------------|-----------------------------------|-------|
| de Aguiar, 2014        | North, PA        | Cross-sectional | Incarcerated women                                                                                                                                                                                                                                              | 100 | 190                            | 30.5                              | 18-60 |
| de Almeida, 2014       | Central-West, MS | Cross-sectional | Young sexually active students                                                                                                                                                                                                                                  | 100 | 236                            | 23.3                              | -     |
| De Brot, 2017          | Southeast, SP    | Cohort          | Women of any age and with no previous history of HPV vaccination who were consecutively and prospectively identified between                                                                                                                                    | 100 | 260                            | 38 (median)                       | 17-85 |
| de Mattos, 2011        | Southeast, ES    | Cross-sectional | HIV negative patients                                                                                                                                                                                                                                           | 100 | 77                             | NI                                | 14-51 |
| de Melo Kuil, 2017     | Southeast, SP    | Cross-sectional | Women aged 18–64 years who were referred to the Colposcopy Ambulatory of the Prevention Department at Barretos Cancer Hospital (Brazil) due to abnormal (atypical squamous cells of uncertain significance or worse) cervical cytology test results (Pap smear) | 100 | 204                            | <25: 19<br>25-45: 83<br>46-64: 61 | 18-64 |
| de Oliveira, 2017      | South, RS        | Cross-sectional | Women attending the Gynecological Service of the University Hospital of Federal University of Rio Grande (HU-FURG), a regional reference where the Papanicolaou test was performed.                                                                             | 100 | 355<br>(HIV:<br>23.6% -<br>84) | 31                                | -     |
| dos Santos, 2013       | North, RO        | Cross-sectional | Women from Women's Health center                                                                                                                                                                                                                                | 100 | 334                            | -                                 | -     |
| Duarte, 2017           | Northeast, PA    | Cross-sectional | Women living in riverside communities from 7 municipalities in the state of Pará participated voluntarily in the present study                                                                                                                                  | 100 | 353                            | 37                                | 16-81 |
| Eluf-Neto, 1994        | Southeast, SP    | Case-control    | Control group, women without invasive cancer, from 7 hospitals                                                                                                                                                                                                  | 100 | 190                            | 52                                | -     |
| Fedrizzi, 2008         | South, SC        | Cross-sectional | Samples from public and private clinic or hospital                                                                                                                                                                                                              | 100 | 100                            | -                                 | -     |
| Fedrizzi, 2009         | South, SC        | Case-control    | Control group, samples from normal endometrium from public and private clinic                                                                                                                                                                                   | 100 | 50                             | -                                 | -     |
| Fernandes, 2008        | Northeast, RN    | Cross-sectional | Women enrolled in cancer screening program                                                                                                                                                                                                                      | 100 | 202                            | 32                                | 15-64 |
| Figueiredo Alves, 2013 | Central-West, GO | Cross-sectional | Sexually active women                                                                                                                                                                                                                                           | 100 | 432                            | 17.2                              | 15-19 |
| Fonseca, 2015          | North, AM        | Cross-sectional | Indigenous women                                                                                                                                                                                                                                                | 100 | 661                            | 35.8                              | 10-92 |
| Franco, 1995           | Northeast, PB    | Cross-sectional | Random sample of participants in a cervical cancer screening program                                                                                                                                                                                            | 100 | 525                            | 41.2                              | -     |

|                  |                           |                                |                                                                                                                                                                    |     |      |                     |       |
|------------------|---------------------------|--------------------------------|--------------------------------------------------------------------------------------------------------------------------------------------------------------------|-----|------|---------------------|-------|
| Freitas, 2009    | Southeast, ES             | Cross-sectional (case-control) | Control group, non-pregnant women from low socioeconomic groups                                                                                                    | 100 | 60   | 25.7                | -     |
| Gadelha, 2017    | Northeast, BA             | Cross-sectional                | Women who attended healthcare units                                                                                                                                | 100 | 195  | 40.3                | 17-82 |
| Gillio-Tos, 2012 | South, PR                 | Cross-sectional (case-control) | Women recruited by centers for cervical screening and campaigns                                                                                                    | 100 | 789  | 32                  | 15-47 |
| Girianelli, 2010 | Southeast, RJ             | Cross-sectional                | Participants from Family Health Program                                                                                                                            | 100 | 2056 | -                   | -     |
| Golfetto, 2018   | South, SC                 | Cross-sectional                | Women were attended for cervical screening in public clinics in São Miguel do Oeste, SC, Brazil                                                                    | 100 | 325  | 37                  | 14-79 |
| Holanda, 2006    | Northeast, CE             | Cross-sectional                | Sexually active women living in rural districts                                                                                                                    | 100 | 878  | -                   | 15-69 |
| Igansi, 2012     | South, RS                 | Cross-sectional                | Non-symptomatic women at Primare Care Unit                                                                                                                         | 100 | 1217 | -                   | -     |
| Krambeck, 2008   | South, SC                 | Cross-sectional                | Women attending gynecological clinics                                                                                                                              | 100 | 97   | 32.6                | 15-60 |
| Leite, 2018      | Southeast, SP             | Cross-sectional                | Healthy women, 18 years-old or older, who spontaneously visited the outpatient care for cervical cancer prevention in a private Sao Paulo's hospital               | 100 | 725  | 39,7                | 18-77 |
| Lima, 2018       | Southeast, MG             | Cross-sectional                | Women examined in a general gynecology clinic and in a colposcopy referral center                                                                                  | 100 | 126  | <35: 65<br>>=35: 61 | -     |
| Lippman, 2010    | Southeast, SP             | Cross-sectional                | Women from primary care clinic                                                                                                                                     | 100 | 818  | -                   | -     |
| Lopes, 2001      | Southeast, SP             | Cross-sectional                | Incarcerated women                                                                                                                                                 | 100 | 262  | 32.4                | -     |
| Lorenzato, 2000  | Northeast, PE             | Case-control                   | Institute of Mother and Child Health and the Cancer Hospital                                                                                                       | 100 | 479  | 36.5                | 13-84 |
| Lorenzi, 2016    | Southeast, SP, MG, MT, GO | Cross-sectional                | Women volunteers were enrolled in an opportunistic screening program that was regularly performed in the Barretos Cancer Hospital                                  | 100 | 3068 | 47 (median)         | 18-85 |
| Lugo, 2018       | Central-West, MS          | Cross-sectional                | Female sex workers working in public places (squares, parks, gardens, streets, avenues, etc.) and private places (saunas, nightclubs, and brothels)                | 100 | 79   | 26.7                | 18-42 |
| Martins, 2012    | South, SC                 | Cross-sectional                | Gynecological examination, in a private clinic setting                                                                                                             | 100 | 162  | -                   | -     |
| Martins, 2016    | Southeast, SP             | Cross-sectional                | Women undergoing routine screening and women referred with a previous abnormal Pap test in the year preceding study enrollment from São Paulo and 99 from Barretos | 100 | 665  | 43                  | 14-95 |

|                    |                  |                                |                                                                                                                                                                                                                              |     |      |                                                                                        |       |
|--------------------|------------------|--------------------------------|------------------------------------------------------------------------------------------------------------------------------------------------------------------------------------------------------------------------------|-----|------|----------------------------------------------------------------------------------------|-------|
| Martins, 2018      | Southeast, SP    | Cross-sectional                | Women undergoing opportunistic routine cervical cancer screening at the Projeto Região Oeste, São Paulo, Brazil                                                                                                              | 100 | 2376 | 43                                                                                     | 14-86 |
| McCormick, 2015    | Southeast, RJ    | Case-control                   | Control group, cervical specimens with normal cytology and colposcopy                                                                                                                                                        | 100 | 15   | -                                                                                      | -     |
| Miranda, 2013      | Southeast, MG    | Cross-sectional                | Random sample of participants in health units                                                                                                                                                                                | 100 | 569  | 37.7                                                                                   | -     |
| Munoz, 1996        | Southeast, SP    | Cross-sectional (case-control) | Control group, women from 5 general hospitals                                                                                                                                                                                | 100 | 175  | 52.7                                                                                   | -     |
| Naud, 2006         | South, RS        | Cross-sectional                | Healthy women among the general population                                                                                                                                                                                   | 100 | 500  | NI                                                                                     | 15-25 |
| Nonato, 2016       | Central-West, GO | Cross-sectional                | Women under the age of 25 years monitored by the Family Health Program                                                                                                                                                       | 100 | 276  | 19.5                                                                                   | 15-24 |
| Nonnenmacher, 2002 | South, RS        | Cross-sectional                | Women with no history of conization attending a cancer screening program                                                                                                                                                     | 100 | 975  | -                                                                                      | -     |
| Noronha, 2011      | North, PA        | Cross-sectional                | Spontaneously Gynecological examination                                                                                                                                                                                      | 100 | 1009 | 36.6                                                                                   | 30-45 |
| Oliveira, 2007     | Northeast, CE    | Cross-sectional                | Women, assisted by the Family Health Program                                                                                                                                                                                 | 100 | 592  | 31.5                                                                                   | -     |
| Oliveira, 2010     | Southeast, RJ    | Cross-sectional                | Sexually active women, no prior history of cervical abnormalities, from public school                                                                                                                                        | 100 | 241  | 19.6                                                                                   | -     |
| Oliveira, 2013     | South, RS        | Cross-sectional                | Women attending Gynecology and Obstetrics Ambulatories and Health Primary Units                                                                                                                                              | 100 | 302  | 32.7                                                                                   | -     |
| Padovani, 2013     | Central-West, MS | Cross-sectional                | Cervical sample from Cancer Prevention Center                                                                                                                                                                                | 100 | 49   | -                                                                                      | -     |
| Paesi, 2015        | South, RS        | Retrospective cross-sectional  | Women aged 20–60 years who were referred to the private Medical Center of Pathology, Caxias do Sul, Brazil, by a gynecologist for assessment of a cervical condition                                                         | 100 | 250  | 32.5                                                                                   | 20-60 |
| Peres, 2015        | Northeast, PE    | Cross-sectional                | Women receiving regular gynecological surveillance from 3 familial health units                                                                                                                                              | 100 | 673  | -                                                                                      | 18-60 |
| Pinheiro, 2016     | North, PA        | Cross-sectional                | Women enrolled in the Cervical Cancer Prevention Program (Programa de Prevenção do Câncer de Colo Uterino - PCCU) developed in riparian communities of four municipalities located in different geographical regions of Pará | 100 | 516  | Itaituba A: 40<br>Itaituba B: 39<br>Limoeiro de Ajurú: 37<br>Acará: 37<br>Bragança: 37 | 13-82 |
| Pinto, 2011        | North, PA        | Cross-sectional                | Women with intact uterus or cervix                                                                                                                                                                                           | 100 | 444  | 36.9*                                                                                  | -     |

|                      |               |                                |                                                                                                      |     |      |                                      |       |
|----------------------|---------------|--------------------------------|------------------------------------------------------------------------------------------------------|-----|------|--------------------------------------|-------|
| Porcari, 2018        | Southeast, SP | Case-control                   | Women receiving regular gynecological surveillance from 3 familial health units                      | 100 | 80   | HPV-positive: 34<br>HPV-negative: 36 | -     |
| Rama, 2006           | Southeast, SP | Cross-sectional                | Healthy, sexually active women looking for care                                                      | 100 | 541  | -                                    | -     |
| Rama, 2010           | Southeast, SP | Cross-sectional                | Primiparous women who gave birth after > 32 weeks of gestation                                       | 100 | 301  | 19.9                                 | -     |
| Resende, 2014        | South, RS     | Case-control                   | Control group, women without cytological abnormalities                                               | 100 | 382  | -                                    | -     |
| Richardson, 2015     | Southeast, SP | Cross-sectional (case-control) | Women attending for regular screening at 1 of 3 participating public hospitals                       | 100 | 1058 | -                                    | -     |
| Rocha, 2013          | North, AM     | Cross-sectional                | Sexually active women using health services                                                          | 100 | 364  | 36.4                                 | 18-78 |
| Rodrigues, 2014      | North         | Cross-sectional                | Sexually active women                                                                                | 100 | 84   | 31.1                                 | 10-66 |
| Rodrigues, 2018      | North, AM     | Cross-sectional                | Non-indigenous HIV-infected and HIV-uninfected women living in the Tapajós region                    | 100 | 153  | 36,9                                 | 17-75 |
| Rosa, 2008           | South, RS     | Cohort                         | Asymptomatic women attending a primary care clinic                                                   | 100 | 1431 | -                                    | -     |
| Roteli-Martins, 2011 | Undefined     | Cross-sectional                | Healthy women with an intact uterus                                                                  | 100 | 3204 | 20.2                                 | -     |
| Salcedo, 2015        | South, RS     | Cross-sectional                | Non-pregnant women, with no history of cervical cancer                                               | 100 | 183  | 31.9                                 | -     |
| Santos, 2012         | South, RS     | Cross-sectional                | Self- collection cervicovaginal sample                                                               | 100 | 39   | -                                    | -     |
| Santos, 2016         | Northeast, AL | Cross-sectional                | Patients attending public and private health centers                                                 | 100 | 515  | 15-25: 121<br>26-40: 314<br>>40: 80  | -     |
| Silva, 2009          | Southeast, RJ | Cross-sectional                | Women attending a private gynaecological clinic                                                      | 100 | 300  | 33                                   | 14-79 |
| Simões, 2017         | Undefined     | Cross-sectional (Abstract)     | Women randomly selected                                                                              | 100 | 100  | -                                    | -     |
| Smith, 2002          | Southeast, SP | Case-control                   | Control group, women with newly diagnosed and not previously treated ICC and hospital-based controls | 100 | 173  | 52.5                                 | -     |
| Soares, 2003         | Northeast, AL | Cross-sectional                | Sexually active women                                                                                | 100 | 341  | 34.4                                 | 15-63 |

|                      |               |                                    |                                                                                                                                                                                                                                                                                                                               |     |      |                                                              |                          |
|----------------------|---------------|------------------------------------|-------------------------------------------------------------------------------------------------------------------------------------------------------------------------------------------------------------------------------------------------------------------------------------------------------------------------------|-----|------|--------------------------------------------------------------|--------------------------|
| Ströher, 2016        | South, RS     | Cross-sectional                    | Women of all ages and of various ethnic groups living in the city of Uruguaiiana who were visiting Basic Health Units for routine gynecological examinations                                                                                                                                                                  | 100 | 51   | 42.7                                                         | 16-86                    |
| Syrjänen, 2005       | Multi, SP/RS  | Cross-sectional/Prospective cohort | Consecutive series of women in their first visit to gynecology clinics                                                                                                                                                                                                                                                        | 100 | 3351 | NI                                                           | -                        |
| Tamegão-Lopes, 2014  | North, PA     | Cross-sectional                    | Women participating in a cervical cancer screening program                                                                                                                                                                                                                                                                    | 100 | 143  | NI                                                           | -                        |
| Teixeira, 2016       | South, RS     | Cross-sectional                    | Mulheres em atendimento em ambulatórios de Ginecologia e Obstetrícia do Hospital Universitário Dr. Miguel Riet Corrêa Jr                                                                                                                                                                                                      | 100 | 200  | 33                                                           | -                        |
| Torres, 2018         | North, AM     | Cross-sectional                    | Women living in rural villages in proximity to Coari city                                                                                                                                                                                                                                                                     | 100 | 412  | 18-25: 79<br>26-36: 150<br>36-46: 99<br>46-54: 39<br>≥54: 45 | -                        |
| Tota, 2016           | Southeast, SP | Longitudinal                       | Population of low-income; women recruited from family medicine, gynecology, and family planning clinics in Sao Paulo, Brazil from 1993 to 1997                                                                                                                                                                                | 100 | 2462 | 32.7                                                         | 18-57<br>(Sichero, 2017) |
| Trugilo, 2019        | South, PR     | Cross-sectional (case-control)     | Women who underwent outpatient cytology testing between 2013 and 2015 at an ambulatory colposcopy facility of the Intermunicipal Consortium of Health of the Middle Paranapanema, at the University Hospital and Clinic Center of the State University of Londrina, and at two Basic Healthcare Units in Londrina—PR, Brazil. | 100 | 349  | -                                                            | -                        |
| Vieira, 2015         | North, PA     | Cross-sectional                    | Students undergoing routine cervical cancer screening                                                                                                                                                                                                                                                                         | 100 | 265  | 25                                                           | 18-55                    |
| Waisberg, 2015       | Southeast, SP | Prospective cohort                 | Women with and without Rheumatoid Arthritis (controls)                                                                                                                                                                                                                                                                        | 100 | 100  | NI                                                           | 18-74                    |
| Wohlmeister, 2016    | South, RS     | Cross-sectional                    | Women from one private medical unit                                                                                                                                                                                                                                                                                           | 100 | 169  | 33                                                           | 15-64                    |
| Xavier-Souza, 2018   | Northeast, BA | Cross-sectional                    | Female adolescents attending a STI Referral Centre                                                                                                                                                                                                                                                                            | 100 | 789  | 16.08                                                        | 10-19                    |
| Yamamoto, 2004       | Southeast, SP | Cross-sectional                    | Women recruited from outpatient clinics and in-patient wards of public hospitals                                                                                                                                                                                                                                              | 100 | 196  | 52                                                           | 18-79                    |
| <b>Penile region</b> |               |                                    |                                                                                                                                                                                                                                                                                                                               |     |      |                                                              |                          |

|                    |               |                    |                                                                                                                                                                     |     |      |                                        |       |
|--------------------|---------------|--------------------|---------------------------------------------------------------------------------------------------------------------------------------------------------------------|-----|------|----------------------------------------|-------|
| Afonso, 2016       | Southeast     | Cross-sectional    | 30 penile foreskin specimens from men 18 to 56 years old who underwent circumcision and 110 penile swab samples were obtained from male patients 18 to 67 years old | 0   | 140  |                                        | 18-67 |
| Eleutério, 2010    | Northeast, CE | Cross-sectional    | Samples of penile scrapings received from private urological offices                                                                                                | 0   | 88   | -                                      | -     |
| Franceschi, 2002   | Southeast, SP | Cross-sectional    | Husbands or current stable partners of case and control women with ICC                                                                                              | 0   | 109  | -                                      | -     |
| Giraldo, 2008      | Undefined     | Cross-sectional    | Asymptomatic men, partners of women with CIN                                                                                                                        | 0   | 54   | 29                                     | -     |
| Menezes, 2014      | Southeast, RJ | Cross-sectional    | Asymptomatic men from STI clinic, dermatology clinic and a metallurgical factory                                                                                    | 0   | 550  | 28.4                                   | 18-65 |
| Rocha, 2012        | Southeast, MG | Cross-sectional    | Asymptomatic men whose sexual partner had presented HPV                                                                                                             | 0   | 43   | -                                      | 18-60 |
| Rocha, 2015        | Southeast     | Cross-sectional    | Asymptomatic men, showing no clinically detectable HPV lesions                                                                                                      | 0   | 261  | 26.3                                   | 18-65 |
| Rombaldi, 2006     | South, RS     | Cross-sectional    | Male sexual partners of women with CIN                                                                                                                              | 0   | 99   | -                                      | -     |
| Silva, 2011        | Southeast, SP | Prospective cohort | Control group, HIV negative patients                                                                                                                                | 0   | 77   | 30.2                                   | -     |
| Sudenga, 2017b     | Southeast     | Cohort             | Men aged 18-70 years living in Sao Paulo, Brazil (HIM Study)                                                                                                        | 0   | 1410 | 18-30: 242<br>31-44: 675<br>45-74: 178 | -     |
| <b>Anal region</b> |               |                    |                                                                                                                                                                     |     |      |                                        |       |
| Eleutério, 2015    | Northeast, CE | Case control       | Control group, women with colposcopy and HPV test negatives                                                                                                         | 100 | 62   | 32.3                                   | -     |
| Nyitray, 2010      | Southeast, SP | Prospective cohort | HIM study, men from urogenital care and through general media advertising                                                                                           | 0   | 902  | -                                      | 18-70 |
| Soares, 2011       | North, PA     | Cross-sectional    | Control group, patients with non-neoplastic diseases of the anal canal                                                                                              | 64  | 42   | 41.1                                   | 23-66 |
| Sudenga, 2017a     | Southeast, SP | Cohort             | Men aged 18-70 years living in Sao Paulo, Brazil (HIM Study)                                                                                                        | 0   | 731  | 19-30: 290<br>31-44: 341<br>45-70: 100 | 18-70 |
| Veo, 2015          | Southeast, SP | Cross-sectional    | Control group, women with normal colposcopy and colpocytology                                                                                                       | 100 | 102  | 44.8                                   | -     |
| <b>Oral region</b> |               |                    |                                                                                                                                                                     |     |      |                                        |       |



|                     |                  |                                   |                                                                                                                                                                                                                                                                 |      |     |      |       |
|---------------------|------------------|-----------------------------------|-----------------------------------------------------------------------------------------------------------------------------------------------------------------------------------------------------------------------------------------------------------------|------|-----|------|-------|
| Antunes, 2012       | South, RS        | Cross-sectional, abstract         | Smokers and alcoholic patients                                                                                                                                                                                                                                  | NI   | 37  | -    | -     |
| Araujo, 2014        | North, PA        | Cross-sectional                   | Individuals without clinically diagnosable lesions                                                                                                                                                                                                              | 62   | 166 | 35.9 | 18-79 |
| Cavenaghi, 2013     | Southeast, SP    | Cross-sectional                   | Populations from an assistance program in rural district                                                                                                                                                                                                        | 62.1 | 124 | 47.6 | -     |
| da Silva, 2007      | Southeast, SP    | Case-control                      | Control group who had no clinical evidence of disease and no history of cancer                                                                                                                                                                                  | NI   | 10  | -    | -     |
| do Sacramento, 2006 | Southeast, SP    | Cross-sectional                   | Cancer-free individuals selected from hospital                                                                                                                                                                                                                  | 52.1 | 50  | 28   | 16-52 |
| Esquenazi, 2010     | Southeast, RJ    | Cross-sectional                   | Volunteers, young healthy adults                                                                                                                                                                                                                                | 60   | 100 | 22.7 | 20-31 |
| Goncalves, 2006     | Southeast, SP    | Cross-sectional                   | Women with genital HPV infection and healthy women                                                                                                                                                                                                              | 100  | 140 | -    | -     |
| Horewicz, 2010      | Southeast, SP    | Cross-sectional                   | Good general health                                                                                                                                                                                                                                             | NI   | 104 | -    | -     |
| Kreimer, 2013       | Southeast, SP    | Cross-sectional from cohort study | HIM study, healthy men                                                                                                                                                                                                                                          | 0    | 499 | NI   | -     |
| Machado, 2014       | South, RS        | Cross-sectional                   | Asymptomatic oral mucosa                                                                                                                                                                                                                                        | 0    | 559 | 23   | 18-68 |
| Marques, 2015       | Central-West, DF | Cross-sectional                   | Patients diagnosed with CIN and ICC, and their male partners                                                                                                                                                                                                    | 66   | 65  | 39   | 22-60 |
| Oliveira, 2017      | Southeast, RJ    | Cross-sectional                   | Women who were referred to the Family Health Program from Niterói - None of the women had been vaccinated against HPV.                                                                                                                                          | 100  | 76  | 37   | 14-70 |
| Peixoto, 2011       | Northeast, BA    | Cross-sectional                   | Women from outpatient clinics with hystopathologic diagnosis of genital HPV                                                                                                                                                                                     | 100  | 100 | 30   | 20-40 |
| Silva, 2016         | Southeast, RJ    | Cross-sectional (case-control)    | HIV-positive individuals who attended at the University Hospital's ambulatory, Niterói City, Rio de Janeiro, Brazil, between 2009 and 2010. The control group included 120 volunteers from University Hospital's blood donors service, located in the same city | NI   | 197 |      | 18-75 |
| Tristão, 2012       | Undefined        | Cross-sectional                   | Healthy patients                                                                                                                                                                                                                                                | 70   | 125 | NI   | 17-54 |
| Vidotti, 2014       | Northeast, MA    | Cross-sectional                   | Women with cervical lesions compatible with HPV infection                                                                                                                                                                                                       | 100  | 105 | -    | -     |

|                                            |               |                            |                                                                                                                                                 |      |       |                        |       |
|--------------------------------------------|---------------|----------------------------|-------------------------------------------------------------------------------------------------------------------------------------------------|------|-------|------------------------|-------|
| Xavier, 2009                               | Southeast, SP | Cross-sectional            | Men attending the Clinic for Sexually Transmitted Diseases with HPV anogenital lesion(s)                                                        | 0    | 30    | 29.3                   | 18-56 |
| Zonta, 2012                                | Southeast, SP | Cross-sectional            | Incarcerated women with cervical lesions                                                                                                        | 100  | 27    | -                      | 18-60 |
| <b>Genital region</b>                      |               |                            |                                                                                                                                                 |      |       |                        |       |
| Bomfim-Hyppólito, 2013                     | Northeast, CE | Cross-sectional            | Participants from outpatient service                                                                                                            | 56.3 | 103   | 46.7                   | -     |
| Soares, 2014                               | Southeast, SP | Cross-sectional            | Men who had sex with men                                                                                                                        | 0    | 658   | NR                     | -     |
| Stiepcich, 2012                            | Southeast, SP | Cross-sectional (abstract) | Patients of a private health institution                                                                                                        | NI   | 15307 | -                      | -     |
| <b>More than one body regions analyzed</b> |               |                            |                                                                                                                                                 |      |       |                        |       |
| Afonso, 2013                               | Southeast, RJ | Cross-sectional            | Women with CIN as well as their male sexual partners and asymptomatic couples                                                                   | 50   | 120   | 27.6 women<br>35.9 men | -     |
| Autran, 2018                               | Northeast, CE | Cross-sectional            | Immunocompetent women assisted at the medical clinic of Maternidade Escola Assis Chateaubriand, with or without genital intraepithelial lesions | 100  | 20    | -                      | -     |
| Beder Ribeiro, 2014                        | Northeast, PE | Cross-sectional            | Married couples, male partners had penile lesions                                                                                               | 50   | 31    | -                      | -     |
| Carestiato, 2006                           | Southeast, RJ | Cross-sectional            | Women for routine exams and men for medical suspicious of infections                                                                            | 79.7 | 7314  | 28.8                   | -     |
| Castro, 2009                               | Northeast, AL | Cross-sectional            | Women with genital HPV infection                                                                                                                | 100  | 30    | -                      | -     |
| Lima, 2014                                 | Southeast, SP | Case control               | Control group, HIV (-) women recruited from a sexual health clinic                                                                              | 100  | 100   | -                      | -     |
| Nicolau, 2005                              | Southeast, SP | Cross-sectional            | Stable sexual partners of confirmed HPV-infected women                                                                                          | 0    | 50    | 31.0                   | 19-53 |
| Rosenblatt, 2004                           | Undefined     | Cross-sectional            | Partners of women with CIN and normal women                                                                                                     | 33.3 | 180   | NI                     | -     |

AL, Alagoas; AM, Amazonas; BA, Bahia; CE, Ceará; CIN, cervical intraepithelial neoplasia; DF, Distrito Federal; ES, Espírito Santo; GO, Goiás; HIM, Human Papilloma virus in Men; HIV, Human Immunodeficiency Virus; HPV, Human Papilloma virus; ICC, Invasive Cervical Cancer; MA, Maranhão; MG, Minas Gerais; MS, Mato Grosso do Sul; NI, Not Informed; PA, Pará; PB, Paraíba; PE, Pernambuco; PR, Paraná; RJ, Rio de Janeiro; RN, Rio Grande do Norte; RO, Rondônia; RS, Rio Grande do Sul; SC, Santa Catarina; SP, São Paulo; STI, sexually transmitted infection. \*Age in urban area.
