# Supplementary material for: Prevalence of human papillomavirus (HPV) in Brazil: A systematic review and meta-analysis
Source: PubMed Central journal article supplement (PMC7034815; doi:10.1371/journal.pone.0229154), 2020-02-21
Supplement: pone.0229154.s004.pdf [file pone.0229154.s004.pdf]

Additional File 3.

Assessment of studies quality

| <b>"Author, year"</b>   | <b>Research question</b> | <b>Study population</b> | <b>Participation rate</b> | <b>Selection</b> | <b>Sample size</b> | <b>HPV measures</b> | <b>Population-based study</b> |
|-------------------------|--------------------------|-------------------------|---------------------------|------------------|--------------------|---------------------|-------------------------------|
| Afonso, 2013            | Good                     | Good                    | Good                      | Good             | Poor               | Good                | Poor                          |
| Afonso, 2016            | Good                     | Good                    | Other                     | Other            | Other              | Good                | Poor                          |
| Alvarez-Arguelles, 2009 | Good                     | Poor                    | Poor                      | Poor             | Poor               | Good                | Poor                          |
| Amaro-Filho, 2014       | Good                     | Good                    | Other                     | Poor             | Poor               | Good                | Poor                          |
| Amorim, 2017            | Good                     | Good                    | Good                      | Other            | Good               | Good                | Other                         |
| Antunes, 2012           | Good                     | Poor                    | Poor                      | Poor             | Poor               | Good                | Poor                          |
| Araujo, 2014            | Good                     | Good                    | Other                     | Good             | Good               | Good                | Poor                          |
| Araujo, 2014b           | Good                     | Good                    | Other                     | Poor             | Poor               | Good                | Poor                          |
| Augusto, 2014           | Good                     | Good                    | Other                     | Good             | Poor               | Good                | Poor                          |
| Autran, 2018            | Good                     | Good                    | Other                     | Good             | Other              | Poor                | Other                         |
| Ayres, 2017             | Good                     | Good                    | Good                      | Good             | Other              | Good                | Good                          |
| Baldi, 2015             | Good                     | Good                    | Other                     | Good             | Poor               | Good                | Poor                          |
| Baldin, 2011            | Good                     | Good                    | Good                      | Good             | Poor               | Good                | Poor                          |
| Batista, 2017           | Good                     | Good                    | Good                      | Good             | Good               | Good                | Good                          |
| Becker, 2001            | Good                     | Good                    | Good                      | Good             | Poor               | Good                | Poor                          |
| Bomfim-Hyppólito, 2013  | Good                     | Good                    | Good                      | Good             | Poor               | Poor                | Poor                          |
| Boon, 2001              | Good                     | Poor                    | Other                     | Good             | Poor               | Good                | Poor                          |
| Brito, 2002             | Good                     | Poor                    | Good                      | Good             | Poor               | Good                | Poor                          |
| Caixeta, 2015           | Good                     | Good                    | Other                     | Good             | Poor               | Good                | Poor                          |
| Campos, 2012            | Good                     | Poor                    | Good                      | Poor             | Good               | Good                | Poor                          |
| Campos, 2014            | Good                     | Poor                    | Poor                      | Good             | Poor               | Good                | Poor                          |

|                      |      |      |       |      |       |      |      |
|----------------------|------|------|-------|------|-------|------|------|
| Carestiato, 2006     | Good | Poor | Other | Poor | Poor  | Good | Poor |
| Cassel, 2014         | Good | Good | Other | Good | Poor  | Good | Poor |
| Castro, 2009         | Good | Poor | Other | Good | Poor  | Good | Poor |
| Cavenaghi, 2013      | Good | Poor | Good  | Good | Good  | Good | Poor |
| Ceccato Junior, 2015 | Good | Good | Other | Poor | Poor  | Good | Poor |
| Chagas, 2015         | Good | Good | Other | Poor | Poor  | Good | Poor |
| Coser, 2013          | Good | Good | Other | Good | Poor  | Good | Poor |
| Coser, 2016          | Good | Good | Other | Good | Other | Good | Good |
| Costa-Lira, 2017     | Good | Good | Other | Good | Other | Good | Good |
| da Silva, 2007       | Good | Poor | Other | Poor | Poor  | Good | Poor |
| da Silva, 2012       | Good | Good | Good  | Good | Poor  | Good | Poor |
| de Abreu, 2016       | Good | Good | Other | Good | Poor  | Good | Good |
| de Aguiar, 2014      | Good | Good | Good  | Poor | Good  | Good | Good |
| de Almeida, 2014     | Good | Poor | Good  | Poor | Poor  | Good | Poor |
| De Brot, 2017        | Good | Good | Other | Good | Other | Good | Poor |
| de Mattos, 2011      | Good | Good | Other | Poor | Poor  | Good | Poor |
| de Medeiros, 2008    | Good | Good | Other | Good | Poor  | Good | Poor |
| de Oliveira, 2017    | Good | Good | Other | Good | Other | Good | Good |
| do Sacramento, 2006  | Good | Poor | Other | Poor | Poor  | Good | Poor |
| dos Santos, 2013     | Good | Good | Good  | Poor | Poor  | Good | Poor |
| Duarte, 2017         | Good | Good | Other | Good | Other | Good | Good |
| Eleuterio, 2010      | Good | Good | Other | Poor | Poor  | Good | Poor |
| Eleuterio, 2015      | Good | Good | Other | Poor | Poor  | Good | Poor |
| Eluf-Neto, 1994      | Good | Good | Good  | Poor | Poor  | Good | Poor |
| Esquenazi, 2010      | Good | Good | Other | Poor | Poor  | Good | Poor |
| Fedrizzi, 2008       | Good | Good | Other | Poor | Poor  | Good | Poor |
| Fedrizzi, 2009       | Good | Poor | Other | Poor | Poor  | Good | Poor |

|                        |      |      |       |       |       |      |       |
|------------------------|------|------|-------|-------|-------|------|-------|
| Figueiredo Alves, 2013 | Good | Good | Other | Good  | Good  | Good | Good  |
| Fonseca, 2015          | Good | Good | Good  | Good  | Good  | Good | poor  |
| Franceschi, 2002       | Good | Good | Good  | Good  | Poor  | Good | Poor  |
| Franco, 1995           | Good | Good | Good  | Good  | Poor  | Good | Poor  |
| Freitas, 2009          | Good | Poor | Good  | Poor  | Poor  | Good | Poor  |
| Gadelha, 2017          | Good | Good | Other | Good  | Other | Good | Good  |
| Gillio-Tos, 2012       | Good | Good | Other | Poor  | Poor  | Good | Poor  |
| Giraldo, 2008          | Good | Poor | Other | Poor  | Poor  | Good | Poor  |
| Girianelli, 2010       | Good | Good | Good  | Good  | Poor  | Good | Poor  |
| Golfetto, 2018         | Good | Good | Poor  | Good  | Good  | Good | Good  |
| Goncalves, 2006        | Good | Good | Other | Good  | Poor  | Good | Poor  |
| Holanda, 2006          | Good | Good | Other | Good  | Good  | Good | Poor  |
| Horewikz, 2010         | Good | Poor | Other | Poor  | Poor  | Good | Poor  |
| Igansi, 2012           | Good | Good | Other | Poor  | Poor  | Good | Poor  |
| Krambeck, 2008         | Good | Good | Other | Poor  | Poor  | Good | Poor  |
| Kreimer, 2011          | Good | Good | Other | Poor  | Poor  | Good | Poor  |
| Kuil, 2017             | Good | Good | Other | Good  | Good  | Good | Poor  |
| Leite, 2018            | Good | Good | Other | Good  | Other | Good | Good  |
| Lima, 2014             | Good | Poor | Other | Good  | Poor  | Good | Poor  |
| Lima, 2018             | Good | Good | Other | Other | Other | Good | Other |
| Lippman, 2010          | Good | Good | Good  | Good  | Poor  | Good | Poor  |
| Lopes, 2001            | Good | Good | Good  | Good  | Poor  | Good | Poor  |
| Lorenzato, 2000        | Good | Poor | Other | Poor  | Poor  | Good | Poor  |
| Lorenzi, 2016          | Good | Good | Other | Good  | Poor  | Good | Good  |
| Lugo, 2018             | Good | Good | Other | Good  | Other | Good | Poor  |
| Machado, 2014          | Good | Poor | Other | Poor  | Poor  | Good | Poor  |
| Marques, 2015          | Good | Good | Poor  | Poor  | Poor  | Good | Poor  |

|                    |      |      |       |       |       |      |       |
|--------------------|------|------|-------|-------|-------|------|-------|
| Martins, 2012      | Good | Good | Other | Good  | Poor  | Good | Poor  |
| Martins, 2016      | Good | Poor | Other | Poor  | Other | Good | Poor  |
| Martins, 2018      | Good | Good | Good  | Good  | Other | Good | Poor  |
| McCormick, 2015    | Good | Good | Other | Good  | Poor  | Good | Poor  |
| Menezes, 2014      | Good | Good | Other | Poor  | Poor  | Good | Poor  |
| Miranda, 2013      | Good | Poor | Other | Good  | Good  | Good | Poor  |
| Munoz, 1996        | Good | Good | Other | Poor  | Poor  | Good | Poor  |
| Naud, 2006         | Good | Good | Good  | Good  | Poor  | Good | Good  |
| Nicolau, 2005      | Good | Poor | Good  | Good  | Poor  | Good | Poor  |
| Nonato, 2016       | Good | Good | Good  | Good  | Good  | Good | Good  |
| Nonnenmacher, 2002 | Good | Poor | Good  | Other | Good  | Good | Poor  |
| Noronha, 2011      | Poor | Good | Good  | Good  | Poor  | Poor | Poor  |
| Nyitray, 2010      | Good | Good | Good  | Poor  | Poor  | Good | Poor  |
| Oliveira, 2007     | Good | Good | Good  | Good  | Other | Good | Good  |
| Oliveira, 2010     | Good | Poor | Good  | Good  | Poor  | Good | Poor  |
| Oliveira, 2013     | Good | Good | Good  | Poor  | Good  | Good | Poor  |
| Oliveira, 2017     | Good | Good | Other | Good  | Other | Good | Poor  |
| Padovani, 2013     | Good | Good | Other | Poor  | Poor  | Good | Poor  |
| Paesi, 2015        | Good | Good | Other | Good  | Good  | Good | Other |
| Peixoto, 2011      | Good | Poor | Other | Poor  | Poor  | Good | Poor  |
| Peres, 2015        | Good | Good | Other | Good  | Other | Good | Good  |
| Pinheiro, 2016     | Good | Good | Other | Good  | Other | Good | Good  |
| Pinto, 2011        | Good | Good | Good  | Poor  | Good  | Good | Good  |
| Porcari, 2018      | Good | Good | Other | Other | Other | Good | Poor  |
| Rama, 2006         | Good | Good | Good  | Poor  | Poor  | Good | Poor  |
| Rama, 2010         | Good | Good | Good  | Good  | Poor  | Good | Poor  |
| Rezende, 2014      | Good | Poor | Other | Other | Poor  | Good | Poor  |

|                      |      |      |       |       |       |      |       |
|----------------------|------|------|-------|-------|-------|------|-------|
| Ribeiro, 2014        | Good | Good | Other | Good  | Poor  | Good | Poor  |
| Richardson, 2015     | Good | Good | Other | Other | Other | Good | Other |
| Rocha, 2012          | Good | Poor | Other | Poor  | Poor  | Good | Poor  |
| Rocha, 2013          | Good | Good | Good  | Good  | Good  | Good | Good  |
| Rocha, 2015          | Good | Good | Good  | Good  | Good  | Good | Good  |
| Rodrigues, 2014      | Good | Good | Good  | Good  | Other | Good | Good  |
| Rodrigues, 2018      | Good | Good | Other | Good  | Good  | Good | Good  |
| Rombaldi, 2006       | Good | Good | Good  | Other | Poor  | Good | Poor  |
| Rosa, 2007           | Good | Good | Other | Poor  | Poor  | Good | Poor  |
| Rosenblatt, 2004     | Good | Poor | Good  | Other | Poor  | Good | Poor  |
| Roteli-Martins, 2011 | Good | Poor | Good  | Poor  | Good  | Good | Poor  |
| Salcedo, 2015        | Good | Poor | Good  | Poor  | Poor  | Good | Poor  |
| Santos, 2012         | Good | Poor | Poor  | Poor  | Poor  | Good | Poor  |
| Santos, 2016         | Good | Good | Other | Good  | Other | Good | Good  |
| Silva, 2009b         | Poor | Good | Good  | Poor  | Poor  | Good | Poor  |
| Silva, 2011          | Good | Good | Good  | Good  | Poor  | Good | Poor  |
| Silva, 2016          | Good | Good | Other | Other | Other | Good | Other |
| Simões, 2017         | Good | Poor | Other | Other | Other | Good | Other |
| Smith, 2002          | Good | Good | Good  | Good  | Poor  | Good | Poor  |
| Soares, 2003         | Good | Good | Good  | Good  | Other | Good | Good  |
| Soares, 2011         | Poor | Good | Other | Good  | Poor  | Good | Poor  |
| Soares, 2014         | Good | Good | Good  | Good  | Good  | Good | Good  |
| Stiepcich, 2012      | Good | Poor | Other | Other | Poor  | Poor | Poor  |
| Ströher, 2016        | Good | Good | Other | Good  | Other | Good | Good  |
| Sudenga, 2017a       | Good | Good | Good  | Good  | Other | Good | Poor  |
| Sudenga, 2017b       | Good | Good | Good  | Good  | Other | Good | Good  |
| Syrjänen, 2005       | Good | Good | Other | Poor  | Poor  | Good | Good  |

|                     |      |      |       |       |       |       |       |
|---------------------|------|------|-------|-------|-------|-------|-------|
| Tamegão-Lopes, 2014 | Good | Good | Other | Good  | Poor  | Good  | Poor  |
| Teixeira, 2016      | Good | Good | Other | Good  | Good  | Good  | Good  |
| Torres, 2018        | Good | Good | Other | Good  | Other | Good  | Good  |
| Tota, 2016          | Good | Good | Other | Good  | Other | Good  | Good  |
| Tristão, 2012       | Poor | Poor | Other | Other | Poor  | Good  | Poor  |
| Trugilo, 2018       | Good | Good | Other | Other | Other | Good  | Other |
| Véo, 2015           | Good | Good | Good  | Good  | Poor  | Good  | Poor  |
| Vidotti, 2014       | Good | Good | Good  | Good  | Good  | Good  | Poor  |
| Vieira, 2015        | Good | Good | Good  | Good  | Poor  | Good  | Poor  |
| Waisberg, 2015      | Good | Poor | Good  | Poor  | Poor  | Good  | Poor  |
| Wohlmeister, 2016   | Good | Good | Other | Good  | Other | Good  | Poor  |
| Xavier, 2009        | Good | Poor | Other | Good  | Poor  | Good  | Poor  |
| Xavier-Souza, 2018  | Good | Poor | Other | Other | Other | Other | Good  |
| Yamamoto, 2004      | Good | Poor | Good  | Good  | Poor  | Good  | Poor  |
| Zonta, 2012         | Good | Good | Good  | Good  | Poor  | Good  | Poor  |

Questions: Was the research question or objective in this paper clearly stated?; Was the study population clearly specified and defined?; Was the participation rate of eligible persons at least 50%?; Were all the subjects selected or recruited from the same or similar populations?; Was a sample size justification, power description, or variance and effect estimates provided?; Were the HPV measures (dependent variables) clearly defined?; Was the study a population-based study?

**Evidence profile for prevalence of HPV in Brazil (GRADE)**

| Outcome         | Study design  | N studies;<br>N participants        | Quality of evidence assessment |                          |                      |             |       |                   | Effect                    |
|-----------------|---------------|-------------------------------------|--------------------------------|--------------------------|----------------------|-------------|-------|-------------------|---------------------------|
|                 |               |                                     | Risk of bias                   | Inconsistency            | Indirectness         | Imprecision | Other | Level of evidence | Overall prevalence of HPV |
| Cervical region | Observational | 105 studies;<br>50,822 participants | Serious <sup>1</sup>           | Not serious <sup>2</sup> | Not serious          | Not serious | None  | Low<br>+OO        | 25.41%<br>(22.71, 28.32)  |
| Oral region     | Observational | 20 studies;<br>2,494 participants   | Serious <sup>1</sup>           | Serious <sup>3</sup>     | Serious <sup>4</sup> | Not serious | None  | Very Low<br>+OOO  | 11.89%<br>(6.26, 21.43)   |
| Penile region   | Observational | 12 studies;<br>2,956 participants   | Serious <sup>1</sup>           | Serious <sup>3</sup>     | Serious <sup>4</sup> | Not serious | None  | Very Low<br>+OOO  | 36.21%<br>(23.40, 51.33)  |
| Anal region     | Observational | 7 studies;<br>1,272 participants    | Serious <sup>1</sup>           | Serious <sup>3</sup>     | Serious <sup>4</sup> | Not serious | None  | Very Low<br>+OOO  | 25.68%<br>(14.64, 41.04)  |

<sup>1</sup> Most studies evaluated selected population (few studies with community-based samples).

<sup>2</sup> Although statistical inconsistency varies widely, point estimates across different regions remain similar.

<sup>3</sup> Prevalence varies widely across different regions, with low number of participants in Northeast, North and Central-West, especially for body sites other than cervical.

<sup>4</sup> Most studies from Southeast region; other regions not represented or underrepresented.
