# Supplementary material for: Prevalence of human papillomavirus (HPV) in Brazil: A systematic review and meta-analysis
Source: PubMed Central journal article supplement (PMC7034815; doi:10.1371/journal.pone.0229154), 2020-02-21

(a) cervical

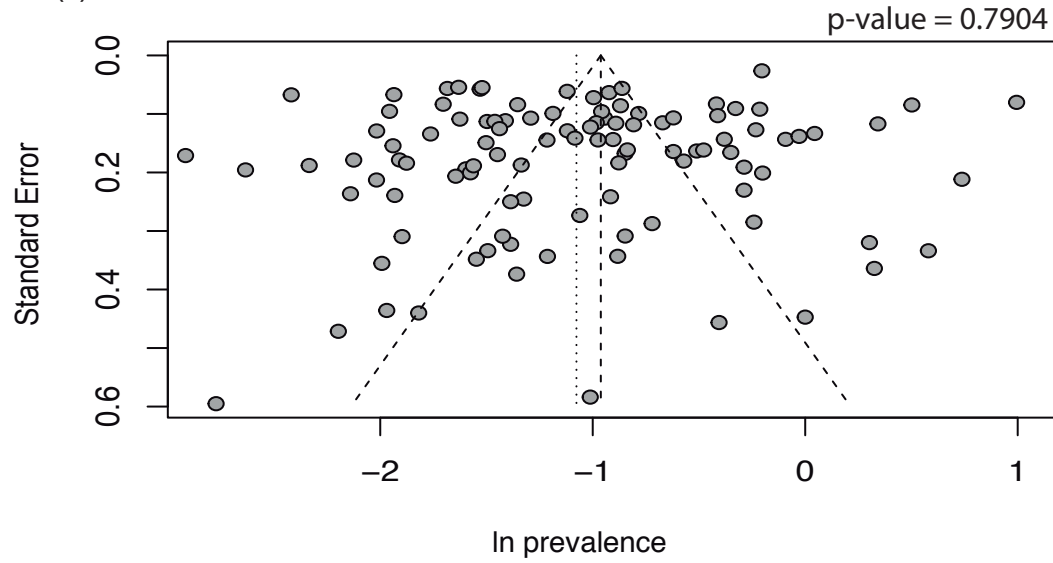

(b) penile

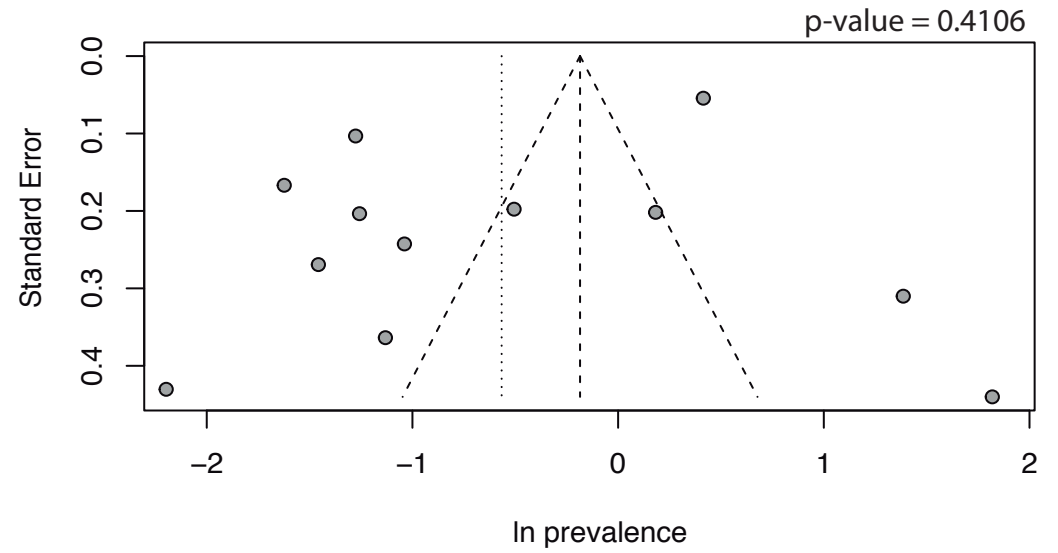

(c) anal

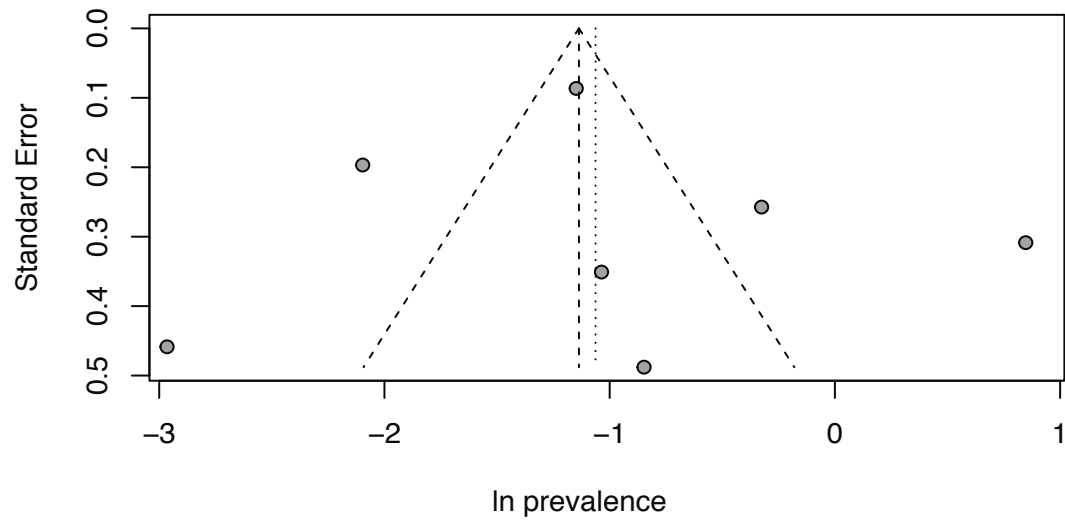

(d) oral

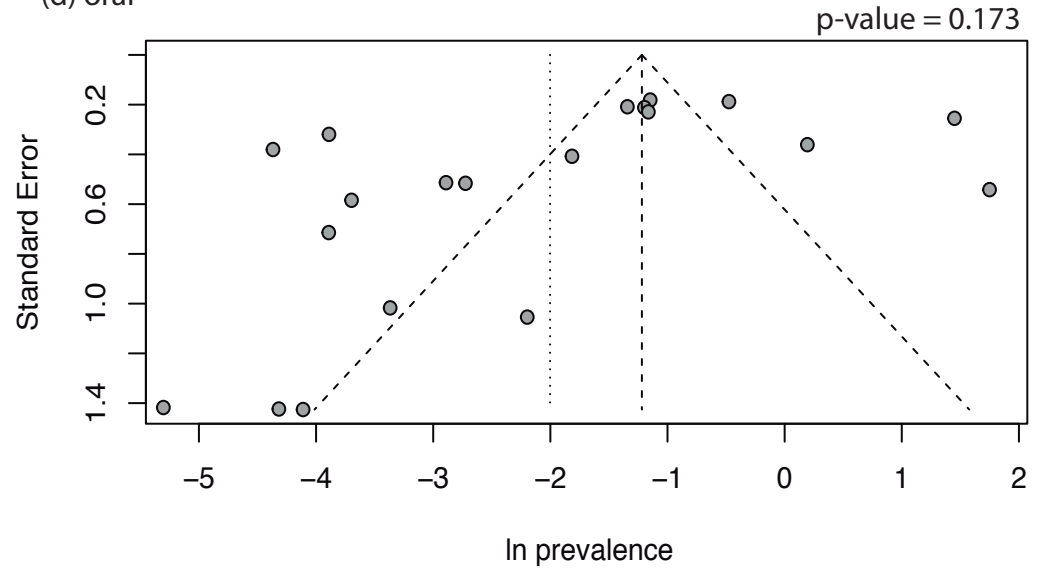

Supplement: pone.0229154.s005.pdf [file pone.0229154.s005.pdf]
