# Supplementary material for: Prevalence of human papillomavirus (HPV) in Brazil: A systematic review and meta-analysis
Source: PubMed Central journal article supplement (PMC7034815; doi:10.1371/journal.pone.0229154), 2020-02-21

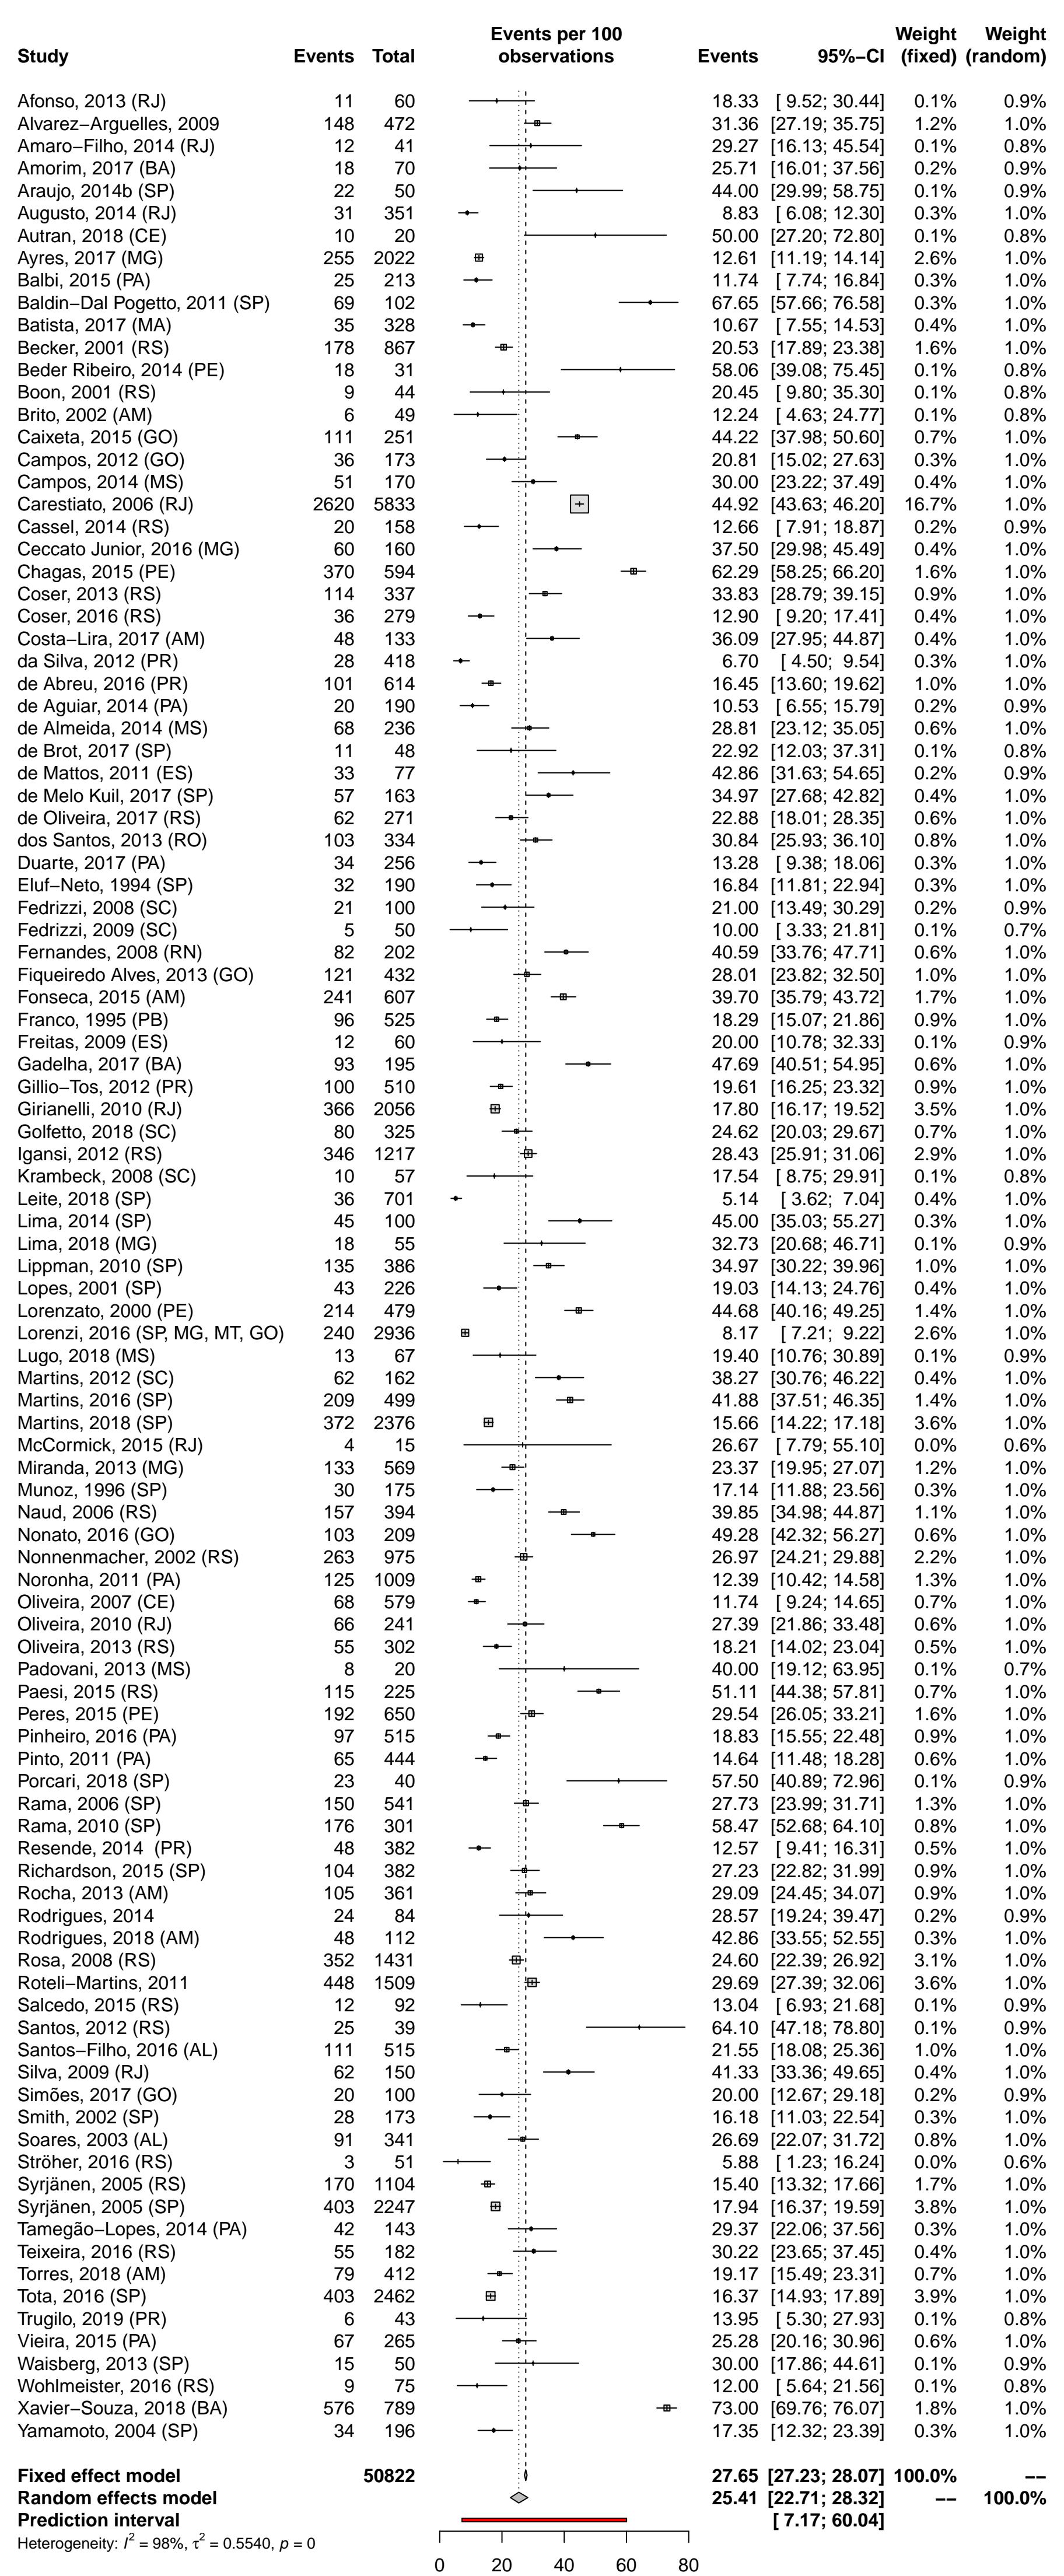

Supplement: pone.0229154.s006.pdf [file pone.0229154.s006.pdf]
